# Supplementary material
Source: PubMed Central journal article supplement (PMC7098194)
Supplement: 41577_2013_BFnri3551_MOESM9_ESM.pdf [file 41577_2013_BFnri3551_MOESM9_ESM.pdf]

Supplementary information S1 (table) | **Natural reservoir hosts and susceptible hosts involved in transmission of bacterial, prion, parasitic and other viral zoonotic diseases**

| Disease                                                                       | Known reservoir hosts                                                                                                                              | Other Susceptible hosts  | Transmitted to humans by                                                                                                                                          |
|-------------------------------------------------------------------------------|----------------------------------------------------------------------------------------------------------------------------------------------------|--------------------------|-------------------------------------------------------------------------------------------------------------------------------------------------------------------|
| <b>Bacterial</b>                                                              |                                                                                                                                                    |                          |                                                                                                                                                                   |
| Anthrax ( <i>Bacillus anthracis</i> ) <sup>1-5</sup>                          | Buffaloes<br>Cattle<br>Herbivorous mammals<br>Wild birds                                                                                           | All warm blooded animals | All infected animals<br>Environment/aerosols                                                                                                                      |
| Balantidiasis ( <i>Balantidium coli</i> ) <sup>3,6,7</sup>                    | Pigs<br>Wild boars                                                                                                                                 | Primates                 | Environment                                                                                                                                                       |
| Bartonellosis ( <i>Bartonella</i> spp.) <sup>3,8,9</sup>                      | Cattle<br>Cats (cat scratch fever)<br>Coyotes<br>Dogs<br>Foxes<br>Squirrels                                                                        | Horses<br>Wild rodents   | Body lice<br>Fleas<br>Sand flies<br>Ticks                                                                                                                         |
| Bovine tuberculosis ( <i>Mycobacterium bovis</i> ) <sup>4,5</sup>             | Cattle                                                                                                                                             | All mammals              | Cattle<br>All mammals<br>Aerosols                                                                                                                                 |
| Brucellosis ( <i>Brucella abortus</i> , <i>Brucella suis</i> ) <sup>3-5</sup> | Camels<br>Cattle<br>Feral pigs<br>Goats<br>Pigs<br>Sheep                                                                                           |                          | Camels<br>Cattle<br>Feral pigs<br>Goats<br>Pigs<br>Sheep<br>Aerosols                                                                                              |
| <i>Escherichia coli</i> 0157 ( <i>Escherichia coli</i> 0157) <sup>3</sup>     | Cats<br>Cattle<br>Deer<br>Dogs<br>Goats<br>Sheep<br>Wild birds                                                                                     |                          | Cats<br>Cattle<br>Deer<br>Dogs<br>Goats<br>Sheep<br>Wild birds                                                                                                    |
| Leprosy ( <i>Mycobacterium leprae</i> ) <sup>10</sup>                         |                                                                                                                                                    | Armadillos               | Armadillos                                                                                                                                                        |
| Leptospirosis ( <i>Leptospira</i> spp.) <sup>3,4</sup>                        | Cattle<br>Chickens<br>Deer<br>Dogs<br>Goats<br>Hedgehogs<br>Horses<br>Mongooses<br>Opossums<br>Pigs<br>Raccoons<br>Sheep<br>Skunks<br>Wild rodents |                          | Cattle<br>Chickens<br>Deer<br>Dogs<br>Goats<br>Horses<br>Hedgehogs<br>Mongooses<br>Opossums<br>Pigs<br>Raccoons<br>Sheep<br>Skunks<br>Wild rodents<br>Environment |

| Disease                                                                                  | Known reservoir hosts                                                       | Other Susceptible hosts                                                 | Transmitted to humans by                                                                   |
|------------------------------------------------------------------------------------------|-----------------------------------------------------------------------------|-------------------------------------------------------------------------|--------------------------------------------------------------------------------------------|
| Listeriosis ( <i>Listeria monocytogenes</i> ) <sup>3</sup>                               | Cattle<br>Goats<br>Pigs<br>Sheep                                            |                                                                         | Cattle<br>Goats<br>Pigs<br>Sheep                                                           |
| Lyme disease ( <i>Borrelia</i> spp.) <sup>3,11</sup>                                     | Wild rodents                                                                |                                                                         | Ticks                                                                                      |
| Mycobacteriosis/Buruli ulcer ( <i>Mycobacterium ulcerans</i> ) <sup>12,13</sup>          | Amphibians<br>Possums<br>Fish                                               |                                                                         | Mosquitoes<br>Environment<br>Water bugs                                                    |
| Mycobacterium infection (non-tuberculosis) ( <i>Mycobacterium</i> spp.) <sup>14,15</sup> | Buffaloes<br>Cattle<br>Cervids<br>Chickens<br>Pigs<br>Possums<br>Wild birds |                                                                         | Buffaloes<br>Cattle<br>Cervids<br>Chickens<br>Pigs<br>Possums<br>Wild birds<br>Environment |
| Pasteurellosis ( <i>Pasteurella</i> spp.) <sup>16</sup>                                  | Cats<br>Dogs<br>Pigs<br>Poultry<br>Ruminants<br>Wild birds<br>Wild rodents  | Wild cats                                                               | Cats<br>Dogs<br>Pigs<br>Poultry<br>Ruminants<br>Wild birds<br>Wild cats<br>Wild rodents    |
| Plague ( <i>Yersinia pestis</i> ) <sup>3</sup>                                           | Wild rodents                                                                | Cats<br>Dogs                                                            | Fleas<br>Wild rodents<br>Aerosols                                                          |
| Psittacosis ( <i>Chlamydia psittaci</i> ) <sup>3</sup>                                   | Domestic birds<br>Poultry<br>Wild birds                                     |                                                                         | Domestic birds<br>Poultry<br>Wild birds                                                    |
| Q-fever ( <i>Coxiella burnetii</i> ) <sup>3,5</sup>                                      | Bandicoots (marsupial)<br>Cattle<br>Goats<br>Sheep<br>Wallabies             | Birds<br>Buffalo<br>Camels<br>Cats<br>Dogs<br>Horses<br>Pigs<br>Rodents | Environment/aerosols                                                                       |
| Rickettsia/Rocky Mountain spotted fever ( <i>Rickettsia rickettsii</i> ) <sup>3</sup>    | Wild rodents                                                                |                                                                         | Ticks                                                                                      |
| Salmonellosis ( <i>Salmonella</i> spp.) <sup>3</sup>                                     | Chickens<br>Hedgehogs<br>Reptiles                                           |                                                                         | Chickens<br>Hedgehogs<br>Reptiles                                                          |
| Streptococcus suis ( <i>Streptococcus suis</i> ) <sup>17</sup>                           | Pigs                                                                        |                                                                         | Pigs                                                                                       |
| Tularemia ( <i>Francisella tularensis</i> ) <sup>3,4</sup>                               | Wild rodents                                                                |                                                                         | Ticks<br>Wild rodents<br>Environment/aerosols                                              |

| Disease                                                                                          | Known reservoir hosts                                          | Other Susceptible hosts                                       | Transmitted to humans by                                       |
|--------------------------------------------------------------------------------------------------|----------------------------------------------------------------|---------------------------------------------------------------|----------------------------------------------------------------|
| Yersiniosis ( <i>Yersinia enterocolitica</i> ) <sup>18</sup>                                     | Pigs                                                           | Beavers<br>Birds<br>Cats<br>Dogs<br>Wild rodents              | Pigs<br>Environment                                            |
| <b>Viral</b>                                                                                     |                                                                |                                                               |                                                                |
| Arenavirus infections <sup>3,4</sup> :                                                           | Wild rodents                                                   |                                                               | Wild rodents<br>Environment                                    |
| Argentine hemorrhagic fever (Junin virus)                                                        |                                                                |                                                               |                                                                |
| Bolivian hemorrhagic fever (Machupo virus)                                                       |                                                                |                                                               |                                                                |
| Brazilian hemorrhagic fever (Sabia virus)                                                        |                                                                |                                                               |                                                                |
| Chapare hemorrhagic fever (Chapare virus)                                                        |                                                                |                                                               |                                                                |
| Lassa fever (Lassa virus)                                                                        |                                                                |                                                               |                                                                |
| Lujo hemorrhagic fever (Lujo virus)                                                              |                                                                |                                                               |                                                                |
| Lymphocytic choriomeningitis (Lymphocytic choriomeningitis virus)                                |                                                                |                                                               |                                                                |
| Venezuelan hemorrhagic fever (Guanarito virus)                                                   |                                                                |                                                               |                                                                |
| Chikungunya disease (Chikungunya virus) <sup>3</sup>                                             | Primates                                                       |                                                               | Mosquitoes                                                     |
| Eastern equine encephalitis (Eastern equine encephalitis virus) <sup>3,19–21</sup>               | Birds                                                          | Amphibians<br>Mammals (horses, etc)<br>Reptiles (snakes, etc) | Mosquitoes                                                     |
| Hemorrhagic fever with renal syndrome, Hantavirus pulmonary syndrome (Hantaviruses) <sup>3</sup> | Wild rodents                                                   |                                                               | Wild rodents<br>Environment?                                   |
| Hepatitis E (Hepatitis E virus) <sup>3,22</sup>                                                  | Chickens<br>Boar<br>Deer<br>Feral pigs<br>Pigs<br>Wild rodents |                                                               | Chickens<br>Boar<br>Deer<br>Feral pigs<br>Pigs<br>Wild rodents |
| Human Immunodeficiency Virus — AIDS <sup>23</sup>                                                | Chimpanzees<br>Old world monkeys                               | Humans                                                        | Humans                                                         |
| La Crosse encephalitis (La Crosse encephalitis virus) <sup>3</sup>                               | Small mammals (squirrels, chipmunks)                           |                                                               | Mosquitoes                                                     |
| Marburg viral haemorrhagic fever (Marburg virus) <sup>3,4</sup>                                  | Bats                                                           | Primates                                                      | Primates                                                       |
| Menangle (Menangle virus) <sup>24</sup>                                                          | Bats                                                           | Pigs                                                          | Pigs                                                           |
| Murray valley encephalitis (Murray valley encephalitis virus) <sup>25</sup>                      | Waterbirds                                                     | Cattle<br>Horses<br>Primates<br>Sheep                         | Mosquitoes                                                     |
| Nipah (Nipah virus) <sup>3,5,26</sup>                                                            | Bats                                                           | Pigs                                                          | Bats<br>Pigs                                                   |
| Orf (Poxvirus) <sup>27</sup>                                                                     | Goats<br>Sheep                                                 |                                                               | Goats<br>Sheep                                                 |
| Rift valley fever (Rift valley fever virus) <sup>3–5</sup>                                       | Buffaloes<br>Camels<br>Cattle<br>Goats<br>Poultry<br>Sheep     |                                                               | Mosquitoes                                                     |

| Disease                                                                                                                                   | Known reservoir hosts                              | Other Susceptible hosts                    | Transmitted to humans by                                              |
|-------------------------------------------------------------------------------------------------------------------------------------------|----------------------------------------------------|--------------------------------------------|-----------------------------------------------------------------------|
| St Louis encephalitis (St Louis encephalitis virus) <sup>3</sup>                                                                          | Wild birds                                         | Domestic animals                           | Mosquitoes                                                            |
| Tick-borne encephalitis (Tick-borne encephalitis virus) <sup>28</sup>                                                                     | Rodents                                            | Birds<br>Dogs<br>Horses<br>Ruminants       | Ticks                                                                 |
| Venezuelan equine encephalitis (Venezuelan equine encephalitis virus) <sup>19</sup>                                                       | Rodents                                            | Horses                                     | Mosquitoes                                                            |
| Western equine encephalitis (Western equine encephalitis virus) <sup>3,19</sup>                                                           | Rodents                                            | Horses                                     | Mosquitoes                                                            |
| Yellow fever (Yellow fever virus) <sup>3</sup>                                                                                            | Primates                                           |                                            | Mosquitoes                                                            |
| <b>Parasitic</b>                                                                                                                          |                                                    |                                            |                                                                       |
| Chagas disease ( <i>Trypanosoma cruzi</i> ) <sup>3,29,30</sup>                                                                            | Armadillos<br>Opossums<br>Raccoons<br>Wild rodents | All mammals                                | Mosquitoes                                                            |
| Cryptosporidiosis ( <i>Cryptosporidium</i> ) <sup>3</sup>                                                                                 | Cattle<br>Deer<br>Goats<br>Sheep                   |                                            | Cattle<br>Deer<br>Goats<br>Sheep                                      |
| Cystic echinococcosis or hydatid disease ( <i>Echinococcus granulosus</i> tapeworm) <sup>3-5,31</sup>                                     | Dogs<br>Foxes<br>Wolves                            | Cattle<br>Deer<br>Goats<br>Horses<br>Sheep | Cattle<br>Dogs<br>Deer<br>Foxes<br>Goats<br>Horses<br>Sheep<br>Wolves |
| Cysticercosis and neurocysticercosis ( <i>Taenia solium</i> tapeworm) <sup>3,4</sup>                                                      | Pigs                                               |                                            | Pigs                                                                  |
| Giardia ( <i>Giardia intestinalis</i> , <i>Giardia duodenalis</i> ) <sup>3</sup>                                                          | Cats<br>Dogs<br>All mammals                        |                                            | Cats<br>Dogs<br>Environment                                           |
| Leishmaniasis ( <i>Leishmania</i> spp.) <sup>3</sup>                                                                                      | Dogs                                               |                                            | Mosquitoes                                                            |
| Toxoplasmosis ( <i>Toxoplasma gondii</i> ) <sup>3,32</sup>                                                                                | Cats<br>Wild birds<br>Wild rodents                 |                                            | Cats                                                                  |
| Visceral larva migrans/Toxocariasis ( <i>Toxocara canis</i> and <i>Toxocara cati</i> (Nematodes)) <sup>33</sup>                           | Cats<br>Dogs                                       |                                            | Cats<br>Dogs                                                          |
| Zoonotic sleeping sickness or human African trypanosomiasis ( <i>Trypanosoma brucei</i> ) <sup>3,4,34</sup>                               | Cattle                                             | Dogs<br>Goats<br>Pigs<br>Sheep             | Tsetse fly                                                            |
| <b>Prion</b>                                                                                                                              |                                                    |                                            |                                                                       |
| Transmissible spongiform encephalopathy<br>Bovine spongiform encephalopathy, variant<br>Creutzfeldt-Jakob disease (Prions) <sup>3,4</sup> | Cattle                                             |                                            | Cattle                                                                |

1. Kamal, S., Rashid, A.M., Bakar, M. & Ahad, M. Anthrax: an update. *Asian Pac J Trop Biomed* 1, 496–501 (2011).
2. Weiner, Z.P. & Glomski, I.J. Updating perspectives on the initiation of *Bacillus anthracis* growth and dissemination through its host. *Infect Immun* 80, 1626–33 (2012).
3. Centers for Disease Control and Prevention. [www.cdc.gov/](http://www.cdc.gov/) (2013).
4. World Health Organization. <http://www.who.int/zoonoses/diseases/en/> (2013).
5. World Organization for Animal Health. <http://www.oie.int/en/for-the-media/animal-diseases/animal-disease-information-summaries/> (2013).
6. Schuster, F.L. & Ramirez-Avila, L. Current world status of *Balantidium coli*. *Clin Microbiol Rev* 21, 626–38 (2008).
7. Pomajbikova, K. et al. Novel insights into the genetic diversity of *Balantidium* and *Balantidium*-like cyst-forming ciliates. *PLoS Negl Trop Dis* 7, e2140 (2013).
8. Chomel, B.B. & Kasten, R.W. Bartonellosis, an increasingly recognized zoonosis. *J Appl Microbiol* 109, 743–50 (2010).
9. Guptill, L. Bartonellosis. *Vet Microbiol* 140, 347–59 (2010).
10. Truman, R.W. et al. Probable zoonotic leprosy in the southern United States. *N Engl J Med* 364, 1626–33 (2011).
11. European Centre for Disease Prevention and Control. <http://www.ecdc.europa.eu/en/> (2013).
12. Merritt, R.W. et al. Ecology and transmission of Buruli ulcer disease: a systematic review. *PLoS Negl Trop Dis* 4, e911 (2010).
13. Willson, S.J. et al. Fish and amphibians as potential reservoirs of *Mycobacterium ulcerans*, the causative agent of Buruli ulcer disease. *Infect Ecol Epidemiol* 3 (2013).
14. Dhama, K. et al. Tuberculosis in Birds: Insights into the *Mycobacterium avium* Infections. *Vet Med Int* 2011, 712369 (2011).
15. Fitzgerald, S.D. & Kaneene, J.B. Wildlife reservoirs of bovine tuberculosis worldwide: hosts, pathology, surveillance, and control. *Vet Pathol* 50, 488–99 (2013).
16. Wilson, B.A. & Ho, M. *Pasteurella multocida*: from Zoonosis to Cellular Microbiology. *Clin Microbiol Rev* 26, 631–55 (2013).
17. Fulde, M. & Valentin-Weigand, P. Epidemiology and pathogenicity of zoonotic streptococci. *Curr Top Microbiol Immunol* 368, 49–81 (2013).
18. Drummond, N. et al. *Yersinia enterocolitica*: a brief review of the issues relating to the zoonotic pathogen, public health challenges, and the pork production chain. *Foodborne Pathog Dis* 9, 179–89 (2012).
19. Steele, K.E. & Twenhafel, N.A. REVIEW PAPER: pathology of animal models of alphavirus encephalitis. *Vet Pathol* 47, 790–805 (2010).
20. Estep, L.K. et al. A multi-year study of mosquito feeding patterns on avian hosts in a southeastern focus of eastern equine encephalitis virus. *Am J Trop Med Hyg* 84, 718–26 (2011).
21. Graham, S.P. et al. Serosurveillance of eastern equine encephalitis virus in amphibians and reptiles from Alabama, USA. *Am J Trop Med Hyg* 86, 540–4 (2012).
22. Pavio, N., Meng, X.J. & Renou, C. Zoonotic hepatitis E: animal reservoirs and emerging risks. *Vet Res* 41, 46 (2010).
23. Haemlaar, J. The origin and diversity of the HIV-1 pandemic. *Trends Mol Med* 18, 182–92 (2012).
24. Barr, J.A., Smith, C., Marsh, G.A., Field, H. & Wang, L.F. Evidence of bat origin for Menangle virus, a zoonotic paramyxovirus first isolated from diseased pigs. *J Gen Virol* 93, 2590–4 (2012).
25. Carver, S., Bestall, A., Jardine, A. & Ostfeld, R.S. Influence of hosts on the ecology of arboviral transmission: potential mechanisms influencing dengue, Murray Valley encephalitis, and Ross River virus in Australia. *Vector Borne Zoonotic Dis* 9, 51–64 (2009).
26. Clayton, B.A., Wang, L.F. & Marsh, G.A. Henipaviruses: an updated review focusing on the pteropid reservoir and features of transmission. *Zoonoses Public Health* 60, 69–83 (2013).
27. Haig, D.M. & McInnes, C.J. Immunity and counter-immunity during infection with the parapoxvirus orf virus. *Virus Res* 88, 3–16 (2002).
28. Jaenson, T.G., Hjertqvist, M., Bergstrom, T. & Lundkvist, A. Why is tick-borne encephalitis increasing? A review of the key factors causing the increasing incidence of human TBE in Sweden. *Parasit Vectors* 5, 184 (2012).
29. Bern, C., Kjos, S., Yabsley, M.J. & Montgomery, S.P. Trypanosoma cruzi and Chagas' Disease in the United States. *Clin Microbiol Rev* 24, 655–81 (2011).
30. Ramsey, J.M. et al. Ecological connectivity of *Trypanosoma cruzi* reservoirs and *Triatoma pallidipennis* hosts in an anthropogenic landscape with endemic Chagas disease. *PLoS One* 7, e46013 (2012).
31. Mandal, S. & Mandal, M.D. Human cystic echinococcosis: epidemiologic, zoonotic, clinical, diagnostic and therapeutic aspects. *Asian Pac J Trop Med* 5, 253–60 (2012).
32. Elmore, S.A. et al. *Toxoplasma gondii*: epidemiology, feline clinical aspects, and prevention. *Trends Parasitol* 26, 190–6 (2010).
33. Chen, J. et al. Advances in molecular identification, taxonomy, genetic variation and diagnosis of *Toxocara* spp. *Infect Genet Evol* 12, 1344–8 (2012).
34. Njiokou, F. et al. Domestic animals as potential reservoir hosts of *Trypanosoma brucei gambiense* in sleeping sickness foci in Cameroon. *Parasite* 17, 61–6 (2010).
